# Supplementary material for: Development and Yield Traits Indicate That the Constitutive Wound Response Phenotype of Prosystemin Overexpressing Tomato Plants Entails No Fitness Penalty
Source: MDPI journal article supplement (doi:10.3390/agronomy11061148), 2021-06-03
Supplement: s1 [file s1]

**Table S1.** Oligonucleotides employed for qPCR analysis of wound-response and Lox-9 pathway genes in untransformed and prosystemin overexpressing tomato plants.

| Gen           |                                            | Secuencia 5' - 3' |                        |
|---------------|--------------------------------------------|-------------------|------------------------|
| <i>PS</i>     | Prosystemin                                | Forward           | CACCATGAGAAGGGAGGAGA   |
|               |                                            | Reverse           | CCTCCTCATGTTCCATCTTTG  |
| <i>PLA2</i>   | Phospholipase A2-alpha (PLA2)              | Forward           | CTAATGCTGGCCTCTCCTTG   |
|               |                                            | Reverse           | CCCAGGGCATCCACTATACA   |
| <i>LHA</i>    | ATPasa                                     | Forward           | GCAAATACCGTCCTGGCATA,  |
|               |                                            | Reverse           | CCTGTTGAGCAAGACGATGA   |
| <i>Lox D</i>  | Lipoxygenase D                             | Forward           | GGTGTCATCGAGGCTTGC     |
|               |                                            | Reverse           | CCCTGTCACTGCAAACCTTG   |
| <i>AOS 1</i>  | Allene oxide synthase 1                    | Forward           | GACGCATCATTCGAAATCAA   |
|               |                                            | Reverse           | GCGTTTTTCAGTTTCCGACCC  |
| <i>JAZ 2</i>  | Jasmonate ZIM domain 2                     | Forward           | TAGCTCATGCAGTGGTGGT    |
|               |                                            | Reverse           | ATCCGTTGTTACCATCTTCTTC |
| <i>JMT</i>    | Methylesterase/methyl jasmonate esterase   | Forward           | TTTACAACAACGGACAGGATA  |
|               |                                            | Reverse           | ACTCATCGAACAATGGTACG   |
| <i>PPO</i>    | Polyphenol Oxidase                         | Forward           | TTGGCGGACCTTATGATCTC   |
|               |                                            | Reverse           | CATTGTTGTCCACGTTTCAGG  |
| <i>PIN II</i> | Proteinase inhibitor II                    | Forward           | GAAAATCGTTAATTTATCCCAC |
|               |                                            | Reverse           | ACATACAAACTTTCCATCTTTA |
| <i>CYP 2</i>  | Cysteine Proteinase 2                      | Forward           | CATCTGATTTTGACTGGCG    |
|               |                                            | Reverse           | GGTCACACTCATGGTCACAA   |
| <i>SCP</i>    | Wound-inducible Carboxypeptidase           | Forward           | GTGGACCTGGTTGTTCAAG    |
|               |                                            | Reverse           | ATGGATTGTTGTGCAGAGAA   |
| <i>AROGP3</i> | Polygalacturonase non-catalytic subunit PG | Forward           | GACAACTATGGTGCCCCCTG   |
|               |                                            | Reverse           | CTTCACCGCCATTTGCATC    |

---

|                     |                                |         |                        |
|---------------------|--------------------------------|---------|------------------------|
| <b><i>Lox A</i></b> | Lipoxygenase A                 | Forward | GGTTACCTCCCAAATCGTCC   |
|                     |                                | Reverse | TGTTTGTAAGTGCCTGTG     |
| <b><i>HPL</i></b>   | Fatty acid hydroperoxide lyase | Forward | TCTCTTCTTCCTGCACTCCA   |
|                     |                                | Reverse | CCAATGCTGACAGTAGGTGC   |
| <b><i>AOS 3</i></b> | Allene oxide synthase 3        | Forward | GCGGAGGAGTTCAATCCAG    |
|                     |                                | Reverse | CGCATGAAAACTCCACAACC   |
| <b><i>SAND</i></b>  | SAND family protein            | Forward | TTTGCTTGGAGGAACAGAC    |
|                     |                                | Reverse | GAATCAGCTACATCATGCAAGA |
| <b><i>TIP4I</i></b> | TIP41-like family protein      | Forward | GCTGCGTTTCTGGCTTAGG    |
|                     |                                | Reverse | GACAAGGCCTGAAATGTGGT   |

---
